# Supplementary material for: A novel multiplex assay for simultaneous quantification of total and S129 phosphorylated human alpha-synuclein
Source: PubMed Central journal article supplement (PMC4994244; doi:10.1186/s13024-016-0125-0), 2016-08-22
Supplement: 13024_2016_125_MOESM1_ESM.pdf [file 13024_2016_125_MOESM1_ESM.pdf]

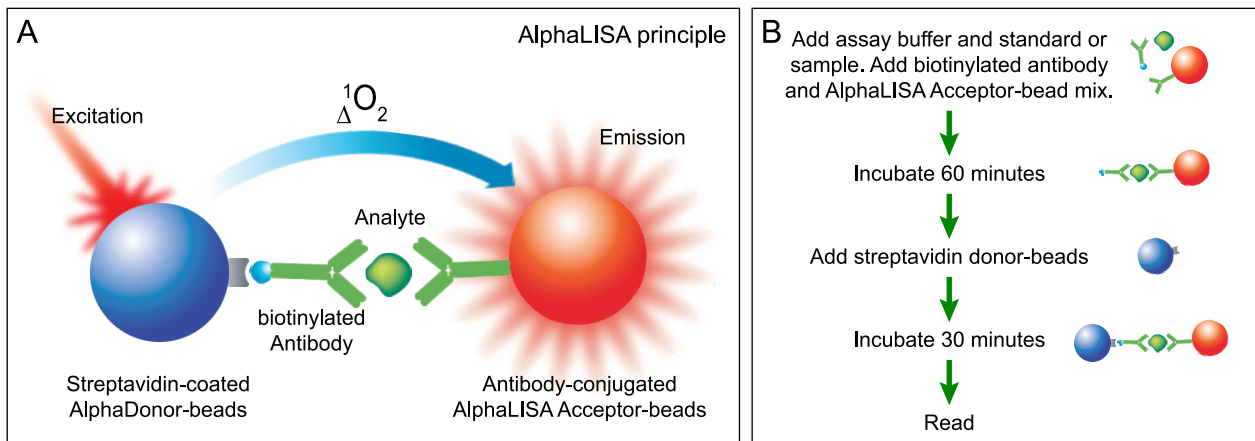

© 2009-2016 PerkinElmer, Inc. All rights reserved. Printed with permission.

**Additional file 1: Figure S1. Principle and protocol of the AlphaLISA technique.** In **A** Streptavidin-coated Donor-beads are bound to biotinylated antibodies. Acceptor-beads are directly coupled to antibodies. When both antibodies bind to an analyte, the beads are brought into close proximity. Donor-beads are excited at 680nm and produce singlet oxygen molecules triggering a chemical reaction in the close-by Europium Acceptor-beads resulting in an emission of light at 615nm. In **B** the protocol of a no-wash AlphaLISA is depicted.
