# Supplementary material for: A novel multiplex assay for simultaneous quantification of total and S129 phosphorylated human alpha-synuclein
Source: PubMed Central journal article supplement (PMC4994244; doi:10.1186/s13024-016-0125-0), 2016-08-22
Supplement: 13024_2016_125_MOESM3_ESM.pdf [file 13024_2016_125_MOESM3_ESM.pdf]

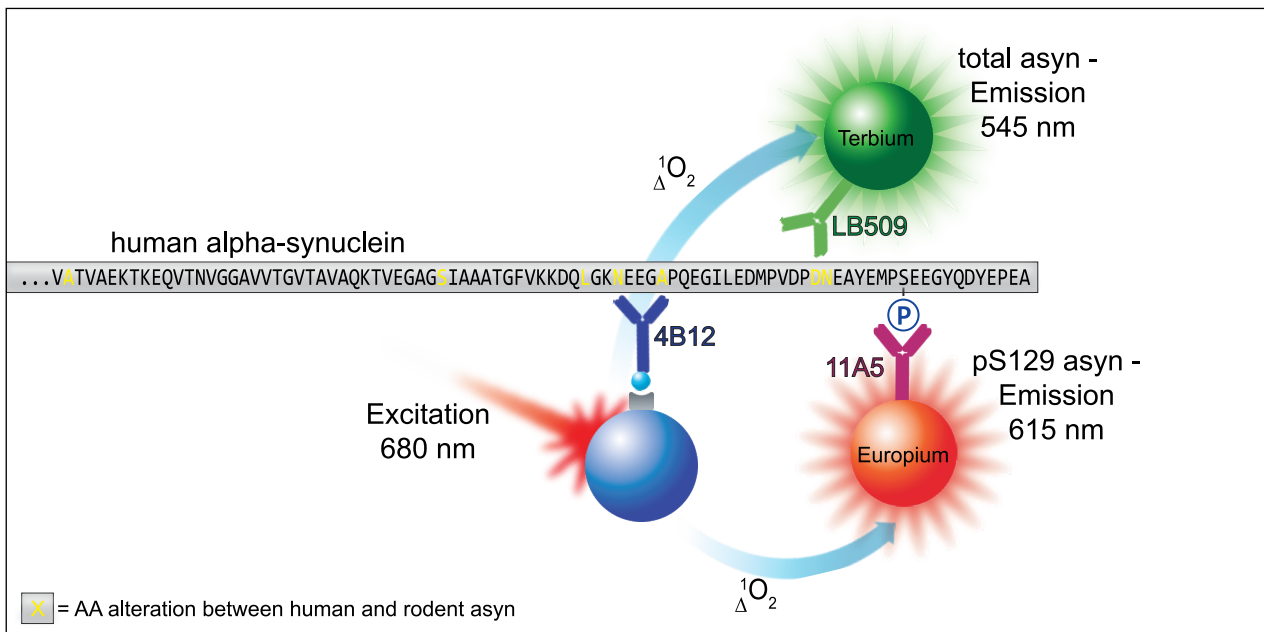

© 2009-2016 PerkinElmer, Inc. All rights reserved. Printed with permission.

**Additional file 3: Figure S3. Scheme of AlphaLISA duplex assay for total and S129 phosphorylated human alpha-synuclein detection.** The 4B12 antibody – binding to aa 103-108 – is biotinylated and used to bind the Streptavidin-coated Donor-beads. Terbium Acceptor beads were coupled to LB509 antibodies for total h-asyn quantification while the 11A5 antibody was used and attached to Europium Acceptor-beads in order to measure pS129 h-asyn. Both antibodies recognize an epitope close to each other (aa 115-122 and aa 129 respectively).
