# Supplementary material for: A novel multiplex assay for simultaneous quantification of total and S129 phosphorylated human alpha-synuclein
Source: PubMed Central journal article supplement (PMC4994244; doi:10.1186/s13024-016-0125-0), 2016-08-22
Supplement: 13024_2016_125_MOESM5_ESM.pdf [file 13024_2016_125_MOESM5_ESM.pdf]

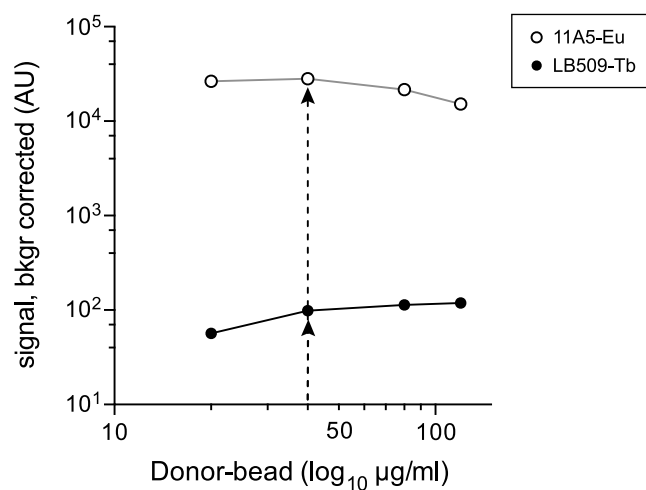

**Additional file 5: Figure S5.** *Assessment of optimal Donor-bead concentration.* The ideal Donor-bead concentration was determined once simultaneously in a mix of Europium Acceptor bead coupled 11A5 antibody and Terbium Acceptor-bead coupled LB509 antibody. Arrows indicate optimal 4B12 concentrations for both Acceptor-bead variants. AU: arbitrary units
