# Supplementary material for: A novel multiplex assay for simultaneous quantification of total and S129 phosphorylated human alpha-synuclein
Source: PubMed Central journal article supplement (PMC4994244; doi:10.1186/s13024-016-0125-0), 2016-08-22
Supplement: 13024_2016_125_MOESM6_ESM.pdf [file 13024_2016_125_MOESM6_ESM.pdf]

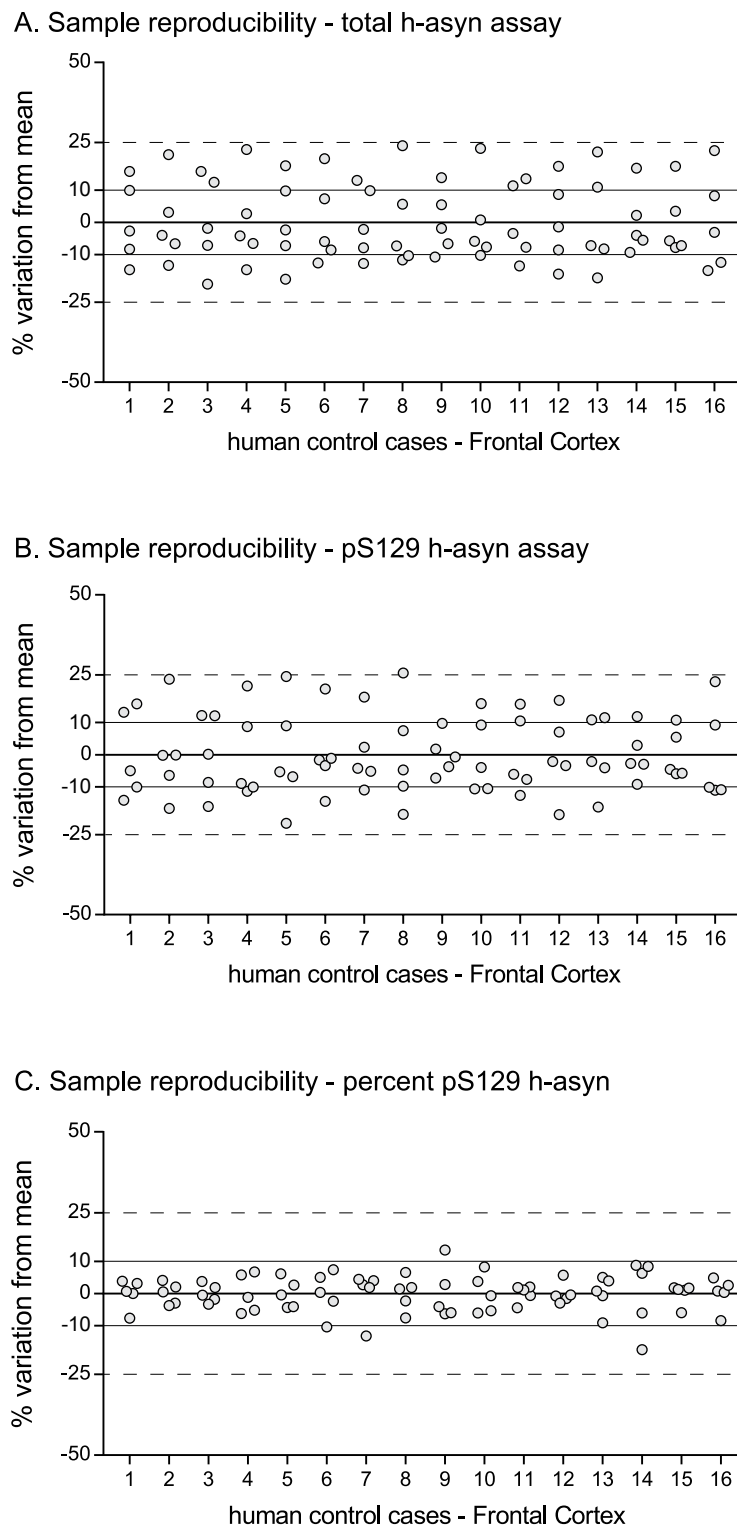

**Additional file 6: Figure S6.** Assessment of assay reproducibility in the duplex assay using cortical human samples. Tissue samples of the frontal cortex (n=16) were lysed using buffer containing 1% Triton and repeatedly analyzed (n=5) using the duplex assay for total and pS129 h-asyn concentration on separate days. Percent variation from the mean value for each sample is plotted for total h-asyn measurements (**A**), for pS129 h-asyn (**B**) and for total to pS129 h-asyn ratio (**C**). Dashed lines indicate  $\pm 25\%$  variation while thin lines indicate  $\pm 10\%$  variation from mean (0%).
